# Supplementary material for: Study on the induction of exogenous plant hormones to enhance the weed suppression ability of allelopathic and non-allelopathic rice accessions
Source: PeerJ. 2025 Jul 15;13:e19700. doi: 10.7717/peerj.19700 (PMC12273701; doi:10.7717/peerj.19700)
Supplement: Supplemental Information 2 [file peerj-13-19700-s002.xlsx]

## Sheet: Sheet1
Fig1.a				Fig1.b
		Sample mean	standard deviation			Sample mean	standard deviation
PI-3μM	1d	4.7536	1.3085	PI-0.3nM	1d	8.6113	0.9306
	3d	4.246	0.7791		3d	6.561	0.6006
	5d	3.8393	1.8156		5d	6.3203	0.8195
	7d	3.6582	0.7795		7d	8.7251	0.3235
PI-5μM	1d	2.6517	0.8772	PI-0.5nM	1d	5.979	0.4279
	3d	3.8889	1.0233		3d	11.4686	2.1531
	5d	2.1535	0.0393		5d	5.7332	0.1996
	7d	6.8204	1.1819		7d	6.4118	1.5967
Le-3μM	1d	7.0809	0.3303	Le-0.3nM	1d	7.0137	1.1861
	3d	13.8842	1.3958		3d	12.1421	1.7765
	5d	9.3605	1.0789		5d	13.0351	0.5017
	7d	10.5071	1.1687		7d	6.8975	1.8868
Le-5μM	1d	10.3065	1.3528	Le-0.5nM	1d	8.609	0.3918
	3d	12.3181	0.9814		3d	14.5617	1.0646
	5d	3.4373	0.8055		5d	10.6133	2.1019
	7d	10.6839	0.5621		7d	7.7191	1.4861
Fig1.c				Fig1.d
		Sample mean	standard deviation			Sample mean	standard deviation
leaf extracts	PI-GA	0.3354	0.0075	leaf extracts	PI-GA	0.3598	0.0117
	PI-3μM	0.467	0.008		PI-0.5nM	0.4264	0.0205
	Le-GA	0.2707	0.0128		Le-GA	0.2714	0.0093
	Le-3μM	0.4025	0.0154		Le-0.5nM	0.4006	0.0303
root exudates	PI-GA	0.306	0.0117	root exudates	PI-GA	0.3059	0.0022
	PI-3μM	0.4022	0.0426		PI-0.5nM	0.3842	0.0291
	Le-GA	0.1814			Le-GA	0.1982	0.0186
	Le-3μM	0.319	0.0061		Le-0.5nM	0.3133	0.0205
Fig. 2b	0-0.2mm		0.2-1.0mm		1.0-2.0mm		Fig. 2C	0-0.2mm		0.2-1.0mm		1.0-2.0mm
	Sample mean	standard deviation	Sample mean	standard deviation	Sample mean	standard deviation		Sample mean	standard deviation	Sample mean	standard deviation	Sample mean	standard deviation
PI-CK	118.509	8.5538	163.209	13.3424	5.236	0.9015	PI-CK	3.1176	0.3848	23.1031	0.3375	2.4437	0.2908
PI-ABA	176.962	3.9726	194.168	13.5021	6.0065	0.9507	PI-ABA	5.7664	0.3457	24.9484	1.0856	2.641	0.268
PI-EBL	231.089	19.2122	250.055	11.2322	8.528	0.956	PI-EBL	7.7572	0.5627	34.2172	0.2136	3.5031	0.231
Le-CK	127.591	6.8658	149.041	6.6785	6.1568	0.9866	Le-CK	3.7381	0.3482	19.8226	0.4044	2.7982	0.2114
Le-ABA	123.755	2.7052	165.208	5.98493	7.2223	0.9929	Le-ABA	3.6977	0.2125	22.2007	0.796	2.952	0.2468
Le-EBL	176.266	3.8169	201.685	7.7588	9.578	0.9984	Le-EBL	5.861	0.3668	30.2202	0.5576	4.2772	0.3597
Fig. 2d	0-0.2mm		0.2-1.0mm		1.0-2.0mm
	Sample mean	standard deviation	Sample mean	standard deviation	Sample mean	standard deviation	Fig. 2e	Sample mean	standard deviation	Fig. 2f	Sample mean	standard deviation
PI-CK	0.0125	0.0031	0.2506	0.0159	0.0853	0.0087	PI-CK	1096.33	42.3373	PI-CK	0.03523	0.00112
PI-ABA	0.0175	0.0021	0.2996	0.0147	0.1132	0.0155	PI-ABA	1297.67	29.0765	PI-ABA	0.04097	0.00198
PI-EBL	0.0231	0.0034	0.384	0.0057	0.1384	0.0185	PI-EBL	1726	82.8674	PI-eBL	0.045	0.000556776
Le-CK	0.0111	0.0012	0.2444	0.0106	0.0969	0.0136	Le-CK	554	11.5326	Le-CK	0.02803	0.000550757
Le-ABA	0.0108	0.0021	0.2716	0.0096	0.0996	0.014	Le-ABA	1121	37	Le-ABA	0.03083	0.000152753
Le-EBL	0.0176	0.0017	0.4191	0.0064	0.168	0.0064	Le-EBL	1007.33	53.0702	Le-eBL	0.0393	0.000556776
							Fig. 3b
Fig. 3a							PI	CK		ABA		EBL
PI	CK		ABA		EBL			Sample mean	standard deviation	Sample mean	standard deviation	Sample mean	standard deviation
	Sample mean	standard deviation	Sample mean	standard deviation	Sample mean	standard deviation	PR	0.2925	0.014	0.812	0.005	0.3858	0.0607
PR	13.6678	0.1818	12.6087	0.1335	16.24	0.1334	HA	0.3541	0.0087	0.1754	0.0033	0.5096	0.0815
HA			2.11804	0.1324	0.8		VA	0.0866	0.0038	0.2448	0.0135	0.0791	0.0065
VA	24.5535	0.3985	22.4446	0.5753	36.0772	0.3766	SY	0.1181	0.0019	0.1549	0.0051	0.0639	0.0058
SY	38.9155	1.1636	48.2862	0.6231	50.5708	0.6617	CM	0.0144	0.0018			0.0192	0.0012
CM	7.9233	0.1953	5.8945	0.1317	7.5152	0.1317	FA	0.018	0.0005			0.137	0.0005
FA	3.1419	0.0573	3.5128	0.1103	2.7608	0.0906	SA	0.0171	0.0022	0.0408	0.0019
SA	4.6287	0.0622	4.2872	0.1342	5.1314	0.1342	CA	0.0297	0.002
CA							Total	0.957	0.0153	1.4137	0.0174	1.1057	0.0996
Total	93.903	1.7154	98.9763	0.7154	118.109	1.077
								CK		ABA		EBL
Le	CK		ABA		EBL		Le	Sample mean	standard deviation	Sample mean	standard deviation	Sample mean	standard deviation
PR	Sample mean	standard deviation	Sample mean	standard deviation	Sample mean	standard deviation	PR	0.0933	0.0025	0.2093	0.0067	0.1463	0.0067
HA	1.8533	0.0663	2.1843	0.1146	2.449	0.1752	HA	0.2217	0.0033	0.1158	0.0033	0.4302	0.0184
VA	14.8376	0.6753	15.7414	0.4194	14.3103	0.4939	VA			0.3201	0.0075	0.4218	0.0247
SY	25.2068	0.3067	26.9355	0.8232	29.5943	0.5304	SY	0.1142	0.0097	0.1452	0.0174	0.1239	0.0039
CM	1.6567	0.036	0.9604	0.1317	1.1165	0.055	CM	0.021	0.0012	0.0918	0.0037	0.0342	0.001
FA	11.5273	0.3309	9.6627	0.2834	10.8783	0.2781	FA	0.0221	0.0023			0.0242	0.0034
SA	3.775	0.0251	4.2209	0.1645	4.2209	0.1004	SA	0.018	0.001	0.0199	0.001	0.0124	0.0017
CA			1.0673	0.0878	0.3927	0.0604	CA	0.0216	0.0005	0.0146	0.0005	0.0222	0.0005
Total	60.327	0.2745	62.5093	1.6358	65.929	1.8033	Total	0.5383	0.0032	1.009	0.0542	1.254	0.0366
Fig. 3c	monoterpene		sesquiterpene		diterpenes		oxygenated monoterpene		oxygenated sesquiterpene
	Sample mean	standard deviation	Sample mean	standard deviation	Sample mean	standard deviation	Sample mean	standard deviation	Sample mean	standard deviation
PI-CK	6.25	1	12.97	2	3.88	1.1	5.26	0.83	7.41	1.21
PI-ABA	18.44	3.2	25.14	1.6	5.89	0.5	16.86	2.83	21.92	1.19
PI-eBL	10.07	2.09	16.37	2.54	4.81	1.22	8.98	1.59	15.23	2.14
Le-CK	7.7	1.88	7.47	0.72	5.21	0.7	6.41	1.18	6.67	0.53
Le-ABA	11.01	1.63	12.46	2.1	5.05	2.78	10.25	1.53	10.7	1.93
Le-eBL	8.81	1	16.85	3.1	6.38	0.8	7.87	1.11	16.24	3.02
Fig. 3 d-e
leaf				root
phenolic acids		Sample mean	standard deviation	phenolic acids		Sample mean	standard deviation
PAL	LE-ABA	2.85799	0.071	PAL	LE-ABA	0.390935	0.004
	LE-EBL	2.23457	0.0637		LE-EBL	0.373712	0.0134
	PI-ABA	1.93187	0.0709		PI-ABA	0.709562	0.2716
	PI-EBL	0.535887	0.0162		PI-EBL	1.53156	0.4696
C4H	LE-ABA	0.784584	0.0491	C4H	LE-ABA	1.01396	0.1228
	LE-EBL	3.49429	0.5031		LE-EBL	0.530344	0.0513
	PI-ABA	0.607097	0.024		PI-ABA	0.562529	0.0352
	PI-EBL	0.917004	0.0162		PI-EBL	0.976032	0.046
F5H	LE-ABA	0.469761	0.0444	F5H	LE-ABA	3.4822	0.4841
	LE-EBL	0.96929	0.1913		LE-EBL	0.280292	0.0804
	PI-ABA	0.363493	0		PI-ABA	1.90528	0.0336
	PI-EBL	1.42899	0.0243		PI-EBL	0.99654	0.0395
COMT	LE-ABA	0.716978	0.0025	COMT	LE-ABA	0.752623	0.0079
	LE-EBL	2.64818	0.0091		LE-EBL	0.690159	0.0172
	PI-ABA	0.435275	0.003		PI-ABA	0.779165	0.011
	PI-EBL	0.879649	0.0251		PI-EBL	1.16878	0.0164
terpenoids				terpenoids
HMGR	LE-ABA	0.744839	0.118	HMGR	LE-ABA	0.552865	0.0324
	LE-EBL	1.90528	0.5216		LE-EBL	0.466516	0.0559
	PI-ABA	0.582367	0.002		PI-ABA	0.49141	0.0087
	PI-EBL	0.435275	0.0376		PI-EBL	1.30586	0.0817
MK	LE-ABA	0.204476	0.0043	MK	LE-ABA	0.643941	0.0044
	LE-EBL	1.70527	0.1		LE-EBL	0.456916	0.0254
	PI-ABA	0.272627	0.0091		PI-ABA	0.820742	0.0676
	PI-EBL	1.41421	0.056		PI-EBL	1.45397	0.1436
MTS	LE-ABA	0.271684	0.0118	MTS	LE-ABA	0.734584	0.0488
	LE-EBL	1.26576	0.0044		LE-EBL	0.248273	0.0466
	PI-ABA	0.104025	0.0018		PI-ABA	0.424842	0.0673
	PI-EBL	0.692555	0.0024		PI-EBL	1.72907	0.1426
STS	LE-ABA	0.216134	0.0022	STS	LE-ABA	0.99654	0.11
	LE-EBL	1.68179	0.0058		LE-EBL	0.15822	0.026
	PI-ABA	0.00682479	0.0004		PI-ABA	0.155501	0.1468
	PI-EBL	1.00696	0.0361		PI-EBL	0.20733	0.4909
PS	LE-ABA	1.20164	0.0083	PS	LE-ABA	1.27456	0.0088
	LE-EBL	1.91853	0.0766		LE-EBL	0.773782	0.008
	PI-ABA	0.622006	0.0458		PI-ABA	2.56685	0.0638
	PI-EBL	1.11729	0.079		PI-EBL	0.271684	0.0143
SQS	LE-ABA	0.49141	0.1606	SQS	LE-ABA	1.01396	0.0835
	LE-EBL	2.25012	0.0397		LE-EBL	0.646176	0.0137
	PI-ABA	0.418994	0.0207		PI-ABA	0.913831	0.3898
	PI-EBL	1.76541	0.0476		PI-EBL	1.91853	0.2373
