# Supplementary material for: Study on the induction of exogenous plant hormones to enhance the weed suppression ability of allelopathic and non-allelopathic rice accessions
Source: PeerJ. 2025 Jul 15;13:e19700. doi: 10.7717/peerj.19700 (PMC12273701; doi:10.7717/peerj.19700)
Supplement: Supplemental Information 3 [file peerj-13-19700-s003.xls]

## Sheet: Sheet1
ITEM TO CHECK	IMPORTANCE	CHECKLIST
EXPERIMENTAL DESIGN
Definition of experimental and control groups	E	Page 11 / Line 257
Number within each group	E	Page 11 / Line 258
Assay carried out by core lab or investigator's lab?	D	Not applicable
Acknowledgement of authors' contributions	D	Page21 / Line511
SAMPLE
Description	E	Page 11 / Line 257
Volume/mass of sample processed	D	Not applicable
Microdissection or macrodissection	E	Not applicable
Processing procedure	E	Page 11 / Line 257
If frozen - how and how quickly?	E	Not applicable
If fixed - with what, how quickly?	E	Not applicable
Sample storage conditions and duration (especially for FFPE samples)	E	Not applicable
NUCLEIC ACID EXTRACTION
Procedure and/or instrumentation	E	Page 11 / Line 262
Name of kit and details of any modifications	E	Not applicable
Source of additional reagents used	D	Not applicable
Details of DNase or RNAse treatment	E	Not applicable
Contamination assessment (DNA or RNA)	E	Page 11/ Line 254-280
Nucleic acid quantification	E	Not applicable
Instrument and method	E	Not applicable
Purity (A260/A280)	D	Not applicable
Yield	D	Not applicable
RNA integrity method/instrument	E	Not applicable
RIN/RQI or Cq of 3' and 5' transcripts	E	Page 11/ Line 262
Electrophoresis traces	D	Not applicable
Inhibition testing (Cq dilutions, spike or other)	E	Not applicable
REVERSE TRANSCRIPTION
Complete reaction conditions	E	Not applicable
Amount of RNA and reaction volume	E	Not applicable
Priming oligonucleotide (if using GSP) and concentration	E	Not applicable
Reverse transcriptase and concentration	E	Not applicable
Temperature and time	E	Not applicable
Manufacturer of reagents and catalogue numbers	D	Not applicable
Cqs with and without RT	D*	Not applicable
Storage conditions of cDNA	D	Not applicable
qPCR TARGET INFORMATION
If multiplex, efficiency and LOD of each assay.	E	Not applicable
Sequence accession number	E	Not applicable
Location of amplicon	D	Not applicable
Amplicon length	E	Not applicable
In silico specificity screen (BLAST, etc)	E	Not applicable
Pseudogenes, retropseudogenes or other homologs?	D	Not applicable
Sequence alignment	D	Not applicable
Secondary structure analysis of amplicon	D	Not applicable
Location of each primer by exon or intron (if applicable)	E	Not applicable
What splice variants are targeted?	E	Not applicable
qPCR OLIGONUCLEOTIDES
Primer sequences	E	Page 11 / Line 262
RTPrimerDB Identification Number	D	Not applicable
Probe sequences	D**	Not applicable
Location and identity of any modifications	E	Not applicable
Manufacturer of oligonucleotides	D	Not applicable
Purification method	D	Not applicable
qPCR PROTOCOL
Complete reaction conditions	E	Not applicable
Reaction volume and amount of cDNA/DNA	E	Not applicable
Primer, (probe), Mg++ and dNTP concentrations	E	Page 11 / Line 262
Polymerase identity and concentration	E	Not applicable
Buffer/kit identity and manufacturer	E	Not applicable
Exact chemical constitution of the buffer	D	Not applicable
Additives (SYBR Green I, DMSO, etc.)	E	Not applicable
Manufacturer of plates/tubes and catalog number	D	Not applicable
Complete thermocycling parameters	E	Not applicable
Reaction setup (manual/robotic)	D	Not applicable
Manufacturer of qPCR instrument	E	Not applicable
qPCR VALIDATION
Evidence of optimisation (from gradients)	D	Not applicable
Specificity (gel, sequence, melt, or digest)	E	Not applicable
For SYBR Green I, Cq of the NTC	E	Not applicable
Standard curves with slope and y-intercept	E	Not applicable
PCR efficiency calculated from slope	E	Not applicable
Confidence interval for PCR efficiency or standard error	D	Not applicable
r2 of standard curve	E	Not applicable
Linear dynamic range	E	Not applicable
Cq variation at lower limit	E	Not applicable
Confidence intervals throughout range	D	Not applicable
Evidence for limit of detection	E	Not applicable
If multiplex, efficiency and LOD of each assay.	E	Not applicable
DATA ANALYSIS
qPCR analysis program (source, version)	E	Page 11 / Line 263
Cq method determination	E	Page 11 / Line 259
Outlier identification and disposition	E	Not applicable
Results of NTCs	E	Not applicable
Justification of number and choice of reference genes	E	Page 11 / Line 255-256
Description of normalisation method	E	Page 11 / Line 259
Number and concordance of biological replicates	D	Page 11 / Line 258
Number and stage (RT or qPCR) of technical replicates	E	Not applicable
Repeatability (intra-assay variation)	E	Not applicable
Reproducibility (inter-assay variation, %CV)	D	Not applicable
Power analysis	D	Not applicable
Statistical methods for result significance	E	Page 11 / Line 264-265
Software (source, version)	E	Page 11 / Line 265
Cq or raw data submission using RDML	D	Not applicable
Table 1. MIQE checklist for authors, reviewers and editors. All essential information (E) must be submitted with the manuscript. Desirable
information (D) should be submitted if available. If using primers obtained from RTPrimerDB, information on qPCR target, oligonucleotides,
protocols and validation is available from that source.
*: Assessing the absence of DNA using a no RT assay is essential when first extracting RNA. Once the sample has been validated as
RDNA-free, inclusion of a no-RT control is desirable, but no longer essential.
**: Disclosure of the probe sequence is highly desirable and strongly encouraged. However, since not all commercial pre-designed assay
vendors provide this information, it cannot be an essential requirement. Use of such assays is advised against.
